# Supplementary material for: Evaluation of an Adapted Semi-Automated DNA Extraction for Human Salivary Shotgun Metagenomics
Source: Biomolecules. 2023 Oct 11;13(10):1505. doi: 10.3390/biom13101505 (PMC10604855; doi:10.3390/biom13101505)
Supplement: Supplementary file 1 [file biomolecules-13-01505-s001.zip › Supplementary-Tables_ASAL.xlsx]

## Sheet: TableS1_Samples
sampleID	Participant_ID	Pooled participantID	Protocol	type	DNA_quantity_ug	genomic_peak_size_bp	fraction1_perc	fraction2_perc	fraction3_perc	total_read_count	removed_host_reads_count	HQ_clean_read_count	perc_mapped_read	msp.richness	gene.richness
ASAL_001	ind1	NA	1	raw	7.61453	60000	57.7802	11.3727	30.8471	22639231	12246842	8548265	79.3032270291106	89	193495
ASAL_002	ind2	NA	1	raw	3.93822	50824	2.34665	3.82565	93.8277	22698513	16543931	4403722	77.1071834234768	131	299695
ASAL_003	ind3	NA	2	raw	7.77744	42470	14.6431	16.2284	69.1285	85399523	60004946	18352429	76.5032628650954	168	330940
ASAL_004	ind4	NA	1	raw	4.69249	59123	1.77531	2.87832	95.3464	31940475	27308930	2207950	72.5549944518671	212	315231
ASAL_006	ind5	NA	2	raw	7.76831	43810	4.36696	7.76502	87.868	21638085	15662235	3919260	74.239907533565	202	310990
ASAL_009	ind6	NA	2	raw	6.56007	42470	1.73691	5.11835	93.1447	42958216	37565691	2012886	68.4925524843434	193	303174
ASAL_010	ind7	NA	2	raw	0.43494	25022	1.55629	15.9797	82.464	22663869	16155152	4690582	76.1777536348368	147	303752
ASAL_011	ind8	NA	1	raw	7.59	53479	1.06259	2.26868	96.6687	78305629	70190803	1911223	60.7764243105069	114	216707
ASAL_015	ind9	ind12	1	pooled	3.85847	60000	3.21941	3.26518	93.5154	21695956	15807525	4139138	72.1476307385741	231	341179
ASAL_016	ind10	ind13	1	pooled	5.65477	60000	3.52615	4.31035	92.1635	39765181	33133069	3249365	73.0081108154978	204	351492
ASAL_017	ind11	ind14	1	pooled	8.9958	50492	38.8908	12.8222	48.287	21081233	17032812	2596081	75.6897030562606	178	236807
ASAL_018	ind12	ind9	2	pooled	2.20946	54475	2.30182	4.70009	92.9981	24375541	18157782	4345258	71.5513785372468	237	344474
ASAL_019	ind13	ind10	2	pooled	3.67565	44815	3.82638	9.86607	86.3075	28147265	23619311	2206354	73.0208298396359	221	360575
ASAL_020	ind14	ind11	2	pooled	7.22942	48500	46.3748	31.1811	22.4441	22733637	18498829	2555568	74.332398903101	175	221321
Table S1: Description of the samples. All participants were sampled at the hospital and gave formal consent prior to sample collection.

## Sheet: TableS2_phylum
sampleID	Actinobacteriota	Bacteroidota	Campylobacterota	Desulfobacterota	Eukaryota	Firmicutes	Fusobacteriota	Patescibacteria	Proteobacteria	Spirochaetota	Synergistetes	unclassified
ASAL_001	3.19883883659516e-05	6.84639257575032e-05	1.76302192443845e-06	0	1.01244469525644e-06	0.000107963185369741	1.7212139150698e-06	9.61516440291076e-07	1.56262474507155e-05	1.14638740800101e-07	9.00931202761957e-08	0
ASAL_002	2.89973977478481e-05	7.07264557603733e-05	3.17282572059002e-06	0	0	7.67862795328208e-05	8.34494948019958e-06	8.09388986550114e-06	3.62795145778666e-05	0	0	5.84883877508461e-08
ASAL_003	1.65523129499425e-05	0.0001061444827679	9.87528365958668e-07	0	7.49206708061253e-07	7.17225291377517e-05	9.25233650670243e-06	5.85058420347157e-06	2.31600227332006e-05	1.46332388459789e-06	0	4.61240901001758e-07
ASAL_004	2.22407852514913e-05	8.89434739340605e-05	1.78462179059005e-06	0	1.79699130971947e-06	5.78579619070856e-05	8.63131069296815e-06	1.5722163849194e-05	3.22278736593481e-05	1.24141875530977e-06	0	1.78576524862998e-06
ASAL_006	1.1595898808506e-05	7.27859871567778e-05	2.39361556194678e-06	0	9.84142116831506e-07	5.53512004080581e-05	1.19536700248988e-05	3.3330316414298e-06	5.32966558534082e-05	2.93251789022361e-06	0	0
ASAL_009	3.13398424972184e-05	7.44558951007333e-05	1.28844517453843e-06	5.72184426698428e-07	4.52323605737889e-06	4.91873474300142e-05	8.55825507522786e-06	7.04387032183563e-06	2.5958381183594e-05	4.70129979045079e-06	6.39769919364451e-07	1.22107093308099e-06
ASAL_010	2.70436014639724e-05	4.93763560504651e-05	2.23270360247602e-06	0	8.47714437635998e-07	5.45404764565467e-05	1.37577579267456e-05	2.68850871752745e-05	5.91892128473341e-05	6.92354357620571e-07	0	1.21340346013831e-05
ASAL_011	4.8842937643912e-05	3.52712729165259e-05	2.77619989413078e-06	2.38210890055325e-07	4.5198707407578e-06	3.00785571158082e-05	1.60692681984858e-06	4.42753472852164e-06	3.94028430246476e-05	2.91768306331809e-06	9.17512601214745e-08	0
ASAL_015	1.71334349539215e-05	5.99283685754083e-05	1.84620675635329e-06	0	1.17253265461287e-06	7.4219541543736e-05	2.05417202595873e-05	9.17781295506484e-06	4.10183820661905e-05	3.688857070751e-06	9.23269660073443e-08	1.89331279451675e-07
ASAL_016	3.72955951913268e-05	6.49484180863216e-05	3.03406870542573e-06	6.99233098967278e-08	3.79141951352789e-06	5.34946607202177e-05	7.82879033567822e-06	1.48685219972018e-05	4.14551165482398e-05	6.51441701934545e-07	0	3.40306922181902e-06
ASAL_017	1.49621505906251e-05	6.30290957701068e-05	1.81700704552749e-06	0	1.4472651741519e-06	3.21116261073476e-05	8.79935862289621e-06	3.58788748022809e-06	7.81672276981107e-05	7.1306671614374e-07	0	7.45620590196205e-07
ASAL_018	1.53021151285343e-05	6.05253446166904e-05	1.54111944154416e-06	0	9.36719038320753e-07	7.79083904427469e-05	1.70320401812242e-05	9.70059956418692e-06	4.02790181079327e-05	4.02434232929994e-06	1.43999936023951e-07	1.49260702795728e-07
ASAL_019	2.63038102735945e-05	5.66365401718847e-05	3.48398699601299e-06	3.65112881141733e-08	3.3862710599468e-06	7.03640086217941e-05	8.51962267544692e-06	1.58206356920426e-05	3.79390499171265e-05	7.52180543182762e-07	0	3.10476576762005e-06
ASAL_020	1.07807329495982e-05	6.48473652513208e-05	1.53486795734424e-06	0	1.89109200378904e-06	3.0234676154043e-05	7.21465939333641e-06	3.26324151628504e-06	8.39953347402546e-05	6.88321091172754e-07	6.50619650115565e-08	5.97067663223502e-07

## Sheet: TableS3_family
sampleID	Actinomycetaceae	Aerococcaceae	Aminobacteriaceae	Anaerolineaceae	Anaerovoracaceae	Atopobiaceae	Bacillaceae	Bacilli RF39 CAG-611	Bacteroidaceae	Bifidobacteriaceae	Bradyrhizobiaceae	Brucellaceae	Burkholderiaceae	Campylobacteraceae	Cardiobacteriaceae	Carnobacteriaceae	Caulobacteraceae	Clostridiales 1c	Clostridiales 2g	Corynebacteriaceae	Desulfobulbaceae	Desulfomicrobiaceae	Desulfovibrionaceae	Dethiosulfovibrionaceae	Dialisteraceae	Eggerthellaceae	Endomicrobiaceae	Enterobacteriaceae	Enterococcaceae	Erysipelatoclostridiaceae	Erysipelotrichaceae	Eubacteriaceae	Eukaryota	Filifactoraceae	Flavobacteriaceae	Fusobacteriaceae	Gemellaceae	Helcococcaceae-Ezakiellaceae	Helicobacteraceae	Lachnospiraceae B	Lachnospiraceae D	Lachnospiraceae H	Lachnospiraceae K	Lactobacillaceae	Leptotrichiaceae	Megasphaeraceae	Metamycoplasmataceae	Methanobacteriaceae	Micrococcaceae
ASAL_001	1.07449524673066e-05	1.13809677131938e-06	9.00931202761957e-08	0	4.96925413693088e-07	1.67338975759923e-05	0	0	1.70648787703543e-06	0	0	0	0	1.76302192443845e-06	0	0	0	0	0	1.30576706012053e-07	0	0	0	0	3.49797536509131e-07	4.56503114230537e-08	0	0	0	0	4.60907838990549e-07	0	1.01244469525644e-06	0	1.20642435691774e-07	1.44011536536876e-06	2.77459009379388e-07	5.91609180032517e-07	0	0	1.03198381998289e-06	1.03758363864332e-06	0	0	2.81098549701043e-07	2.15262725270611e-05	9.45011104164956e-07	0	4.33331130521756e-06
ASAL_002	5.47145699137841e-06	3.40443481515871e-06	0	0	6.45211596108796e-07	3.22786908522392e-06	0	0	4.30490352803463e-06	0	0	0	4.64797530827179e-07	3.17282572059002e-06	6.18864799562087e-08	0	0	0	8.24625248084978e-07	3.93733141058481e-07	0	0	0	0	0	0	0	0	0	0	1.20693824885103e-06	0	0	6.01918151137228e-08	4.91950408537585e-06	4.12453405806684e-06	2.02643558594057e-06	1.65702762869091e-07	0	0	1.37377267914876e-06	4.23287346495896e-06	0	0	4.22041542213274e-06	3.39791081101846e-06	0	0	1.99043385301873e-05
ASAL_003	6.23806475288918e-06	1.81934015640851e-06	0	0	1.99132768770102e-06	5.51182803975055e-06	0	0	1.17035602770384e-05	1.39376489892126e-07	0	0	1.23282262085393e-07	9.87528365958668e-07	0	0	0	2.73875476889734e-07	5.37394336625861e-07	1.22908370285168e-07	0	0	0	0	2.21170711465172e-06	0	0	0	0	0	7.62271543138904e-07	0	7.49206708061253e-07	5.26790334972016e-08	1.98203189383592e-06	7.21752961919264e-06	4.13769141643707e-06	3.97773452599226e-07	0	0	8.16973722688976e-07	2.3106375951526e-06	8.85605736602381e-08	0	2.03480688750979e-06	8.25331035479611e-06	0	0	4.54013529712547e-06
ASAL_004	1.22094383028213e-05	7.73590189188401e-06	0	0	1.54117070498327e-06	1.22678473276228e-06	0	1.29557965735201e-06	6.8463099903217e-06	0	0	0	1.11141700487841e-06	1.78462179059005e-06	4.01469172544126e-07	0	0	3.70589110489859e-07	1.63890734031319e-06	5.36701962240924e-07	0	0	0	0	6.26381724093106e-08	0	0	0	0	0	6.03396660527869e-07	0	1.79699130971947e-06	2.25411627651743e-07	2.79777642562138e-06	5.64189688170969e-06	1.60754547884205e-06	1.09935192369956e-07	0	0	8.44236756182826e-07	2.51901402541067e-06	1.43358002292386e-07	0	2.98941381125846e-06	5.80023679126325e-07	0	0	8.0233940261735e-06
ASAL_006	6.54505525589743e-06	1.93785409478465e-06	0	0	2.68883335948446e-06	1.77857204439189e-06	0	7.28638290834248e-07	1.7464046916665e-05	0	0	0	4.27497751667944e-07	2.39361556194678e-06	3.84919122363695e-07	0	0	5.52877752342605e-07	1.790492017663e-07	1.80391980375111e-07	0	0	0	0	2.26132078045913e-07	0	0	0	0	0	1.51677936584554e-06	0	9.84142116831506e-07	3.70465165001374e-07	3.38271181437987e-06	8.71234914127609e-06	2.82432245048853e-06	2.84826727735432e-06	0	0	1.01306406465461e-06	2.88612455382778e-06	0	0	3.24132088362274e-06	1.7948469397397e-06	0	0	2.6651648122142e-06
ASAL_009	8.31558601772361e-06	1.39766757291782e-06	6.39769919364451e-07	0	2.5431693627819e-06	3.61007405220062e-06	0	4.36989046792749e-08	5.78983506196228e-06	2.16880794602458e-07	0	0	9.46628130865765e-07	1.28844517453843e-06	5.3706754616163e-08	0	0	3.4834544915793e-07	3.13433030377227e-07	7.63878516517403e-07	9.1945477394605e-08	0	4.80238949303823e-07	0	6.12908283637113e-07	0	0	0	0	0	3.66020619707312e-07	0	4.52323605737889e-06	6.46416918579851e-07	5.16456607965425e-07	5.23078005510219e-06	6.42089010442683e-07	7.1062288026826e-07	0	0	4.78051587801574e-07	2.97987936070556e-06	0	3.28796531742345e-07	3.32747502012567e-06	2.95598955399483e-06	0	0	1.81155599894294e-05
ASAL_010	1.52497077778249e-05	2.94533744175083e-06	0	0	9.99156513889355e-07	1.05845893598722e-06	0	2.95370489893031e-06	4.21148093725239e-06	6.53623849286369e-08	0	0	4.04580118214792e-06	2.23270360247602e-06	9.29860804480679e-08	0	0	0	2.46284858242753e-07	6.94277016981574e-07	0	0	0	0	0	0	0	0	0	0	5.45397675378135e-07	0	8.47714437635998e-07	9.01158024583489e-08	8.9052846833727e-06	1.11766645972073e-05	5.58343630427029e-06	2.22584065419182e-07	0	0	3.36013853461655e-07	5.03337947399513e-06	0	0	2.58109332953829e-06	3.26442612016945e-07	0	0	9.68021124992208e-06
ASAL_011	7.63444682349968e-06	6.50159730454227e-07	9.17512601214745e-08	0	5.12686489047836e-07	1.24568565593953e-06	0	0	4.98583696630751e-07	1.40030864129069e-07	0	0	5.78659557288707e-07	2.77619989413078e-06	6.64539805656993e-08	0	0	1.54292832933768e-07	0	0	2.38210890055325e-07	0	0	0	5.87076571015952e-08	0	0	0	0	0	0	7.2347915854806e-08	4.5198707407578e-06	9.04814485482832e-07	7.35466207846213e-07	1.32208283342668e-06	1.67237053480591e-07	5.42189106864528e-07	0	0	0	2.60149990086865e-06	1.05647383191839e-07	0	2.84843986421901e-07	8.82596941511789e-08	0	0	3.98227743003437e-05
ASAL_015	8.13899082427214e-06	4.10819948912622e-06	9.23269660073443e-08	0	2.7502714947647e-06	2.18431525340518e-06	0	2.00911719788863e-06	5.58323125112446e-06	0	0	0	3.86370024860723e-07	1.84620675635329e-06	0	0	0	0	2.2754603530703e-06	4.43218311331707e-07	0	0	0	0	3.29987835705994e-07	0	0	0	0	0	8.99332429866561e-07	0	1.17253265461287e-06	7.04336572623807e-07	7.60001297708285e-06	1.70727903615921e-05	6.19828381652722e-06	1.25047821763396e-06	0	0	2.21534067220049e-06	2.9038723457242e-06	1.1150920270039e-07	0	3.46892989799526e-06	7.69247019834447e-07	1.7279097297078e-07	0	6.36691056491247e-06
ASAL_016	9.9521495259895e-06	1.44020012324189e-06	0	0	2.68766520823057e-06	1.98577874021258e-06	0	4.65358076452049e-07	6.8777210714201e-06	0	0	0	1.06582198782875e-06	3.03406870542573e-06	3.31044023043273e-07	0	0	0	1.38641998020921e-06	4.89476744927684e-07	6.99233098967278e-08	0	0	0	3.35485287601259e-07	0	0	0	0	0	1.81237909563559e-06	0	3.79141951352789e-06	0	2.17191318913401e-06	5.34663112111098e-06	1.27418606390291e-06	3.8382232999288e-07	0	0	1.22513588405683e-06	5.01258475861066e-06	2.87573006768293e-07	0	2.48215921456725e-06	1.37542542066568e-06	0	0	2.4868190180197e-05
ASAL_017	8.5527452268256e-06	1.18643342527125e-06	0	0	1.33391218077623e-06	7.79664154826681e-07	0	0	4.30388408790745e-06	0	0	0	0	1.81700704552749e-06	8.38384830591409e-08	0	0	6.97730120158737e-08	2.90833775321729e-07	4.59208340202041e-07	0	0	0	0	5.3742665525303e-07	4.62712481281707e-08	0	0	0	0	3.63801973554603e-07	0	1.4472651741519e-06	2.11108786773033e-07	3.22704928597485e-06	5.29027305736421e-06	3.00870915384296e-06	8.49465459054052e-07	0	0	3.95224055155471e-07	1.79851903610253e-06	0	0	3.509085565532e-06	4.03821431602979e-07	0	0	5.12426162064266e-06
ASAL_018	8.01484003234862e-06	3.75545595957789e-06	1.43999936023951e-07	0	1.70292401287898e-06	1.60464187964916e-06	0	2.04822620450756e-06	5.63729844771251e-06	0	0	0	2.53474638325453e-07	1.54111944154416e-06	0	0	0	0	2.31290029595029e-06	6.34077138928045e-07	0	0	0	0	4.0543411678414e-07	0	0	0	0	0	3.96101481118357e-07	0	9.36719038320753e-07	6.52495969934728e-07	8.23935218027896e-06	1.47941102531494e-05	9.36271682095915e-06	9.64976332744681e-07	0	0	1.66423613993157e-06	2.35912064824681e-06	2.11479993334331e-07	0	2.23792992807483e-06	6.78550211048541e-07	3.51289671486246e-07	0	5.04855607760845e-06
ASAL_019	1.06822670058373e-05	1.96329322685513e-06	0	0	2.7896391188468e-06	1.38976486980555e-06	0	3.63540034090657e-07	4.90302457260709e-06	0	0	0	8.48157587905738e-07	3.48398699601299e-06	1.73979538149862e-07	0	0	0	1.67136141778872e-06	4.98394469339211e-07	3.65112881141733e-08	0	0	0	3.841424566274e-07	0	0	0	0	0	1.9536957858973e-06	0	3.3862710599468e-06	0	2.66695404256984e-06	5.54270424000797e-06	2.48553622826569e-06	4.8265917438619e-07	0	0	1.05700810448584e-06	7.01129142707129e-06	2.34697075175431e-07	0	2.97691843543894e-06	1.41117913687646e-06	0	0	1.36374888230768e-05
ASAL_020	7.70620634953846e-06	1.34579351261679e-06	6.50619650115565e-08	0	1.20885777497144e-06	5.09330053234871e-07	0	0	4.53260799557165e-06	0	0	0	0	1.53486795734424e-06	6.25660533849265e-08	0	0	5.59829350716182e-08	9.0060965678212e-08	4.94846300035034e-07	0	0	0	0	5.75978077491284e-07	3.69458133102426e-08	0	0	0	0	1.9502030343358e-07	0	1.89109200378904e-06	2.56602080718826e-07	2.1401662639541e-06	4.07454236422771e-06	4.15706971324113e-06	6.77212602907637e-07	0	0	1.62035151380066e-07	1.18636717805583e-06	0	0	3.1401170291087e-06	3.37297572117149e-07	0	0	2.03340443347963e-06
[truncated: 31 more columns]

## Sheet: TableS4_genus
sampleID	Abiotrophia	Acinetobacter	Actinobaculum	Actinomyces	Actinomycetaceae F0332	Afipia	Aggregatibacter	Allisonella	Alloprevotella	Alloscardovia	Alternaria	Anaerococcus	Anaeroglobus	Aspergillus	Atopobium	Bacilli RF39 CAG-611 RUG343	Bacillus	Bacteroides	Bacteroides 2	Bacteroides 3	Bifidobacterium	Bradyrhizobium	Brevundimonas	Butyrivibrio	Campylobacter	Candida	Capnocytophaga	Cardiobacterium	Catonella	Caviibacter	Chryseobacterium	Corynebacterium	Cronobacter	Cryptobacterium	Cutibacterium	Delftia	Desulfobulbus	Desulfomicrobium	Desulfovibrio	Dialister	Dolosigranulum	Eggerthella	Eggerthia	Eikenella	Endomicrobium	Enterobacter	Enterococcus	Escherichia	Eubacterium
ASAL_001	0	0	0	1.03780343708135e-07	0	0	7.20480882736367e-07	0	0	0	0	0	2.15262725270611e-05	0	1.67338975759923e-05	0	0	0	0	0	0	0	0	0	1.76302192443845e-06	0	1.20642435691774e-07	0	0	0	0	1.30576706012053e-07	0	0	0	0	0	0	0	3.49797536509131e-07	0	0	0	0	0	0	0	0	0
ASAL_002	0	0	5.5613862190573e-08	4.36261763391906e-07	0	0	2.0062941248998e-06	0	0	0	0	0	3.39791081101846e-06	0	3.22786908522392e-06	0	0	0	0	0	0	0	0	0	3.17282572059002e-06	0	4.91950408537585e-06	6.18864799562087e-08	0	0	4.54482432646695e-07	3.93733141058481e-07	0	0	0	0	0	0	0	0	0	0	0	0	0	0	0	0	4.80750442384744e-07
ASAL_003	0	0	3.74423055688379e-07	7.19097895286076e-07	0	0	1.36058009583524e-06	1.52086447697054e-07	4.64640568306392e-06	8.29645220847422e-08	0	0	8.25331035479611e-06	0	5.51182803975055e-06	0	0	0	0	0	5.64119678073838e-08	0	0	0	9.87528365958668e-07	0	1.98203189383592e-06	0	8.85605736602381e-08	0	3.28798127638279e-07	1.22908370285168e-07	0	0	0	0	0	0	0	2.05962066695467e-06	0	0	0	1.04410458111157e-07	0	0	0	0	1.249550340001e-06
ASAL_004	5.52157778337826e-07	0	5.07265732321641e-08	1.50868967064211e-06	0	0	2.83190847717799e-06	0	4.85025634016754e-06	0	0	0	5.80023679126325e-07	0	1.22678473276228e-06	0	0	0	0	0	0	0	0	0	1.78462179059005e-06	0	2.79777642562138e-06	4.01469172544126e-07	1.43358002292386e-07	0	1.19709369024926e-06	5.36701962240924e-07	0	0	0	0	0	0	0	6.26381724093106e-08	0	0	0	1.01164792562135e-07	0	0	0	0	1.28283015926358e-06
ASAL_006	3.73035857257802e-07	0	1.92457443617968e-07	5.96132326415767e-07	0	0	2.00932766359526e-06	1.42061734593942e-07	7.00374710159032e-06	0	0	0	1.7948469397397e-06	0	1.73853831082253e-06	6.5187421461313e-07	0	0	0	0	0	0	0	0	2.39361556194678e-06	0	3.38271181437987e-06	3.84919122363695e-07	0	6.79885338802719e-07	2.16768696453472e-06	1.80391980375111e-07	0	0	0	0	0	0	0	8.40703434519717e-08	0	0	0	1.78911389126013e-07	0	0	0	0	2.15783414389104e-06
ASAL_009	0	0	0	2.01370712045845e-06	0	0	9.26072713538593e-07	0	5.13202298361377e-06	8.76128951962361e-08	0	0	2.95598955399483e-06	0	3.56388120792882e-06	4.36989046792749e-08	0	0	0	0	0	0	0	0	1.28844517453843e-06	0	5.16456607965425e-07	5.3706754616163e-08	0	0	2.17045522862274e-07	7.63878516517403e-07	0	0	0	0	9.1945477394605e-08	0	4.80238949303823e-07	6.12908283637113e-07	0	0	0	0	0	0	0	0	2.04068605952937e-06
ASAL_010	2.14707493941696e-07	0	5.85665711684277e-07	2.67885615477903e-06	0	0	6.47576019890543e-07	0	1.90952073761508e-06	0	0	0	3.26442612016945e-07	0	1.05845893598722e-06	0	0	0	0	0	0	0	0	0	2.23270360247602e-06	0	8.9052846833727e-06	9.29860804480679e-08	0	0	8.17191899556813e-07	6.94277016981574e-07	0	0	0	0	0	0	0	0	0	0	0	7.70736348888097e-07	0	0	0	0	6.39728409070599e-07
ASAL_011	0	0	0	1.13239336673661e-06	0	0	0	0	2.27896803321589e-07	0	0	0	8.82596941511789e-08	0	1.24568565593953e-06	0	0	0	0	0	1.40030864129069e-07	0	0	0	2.77619989413078e-06	0	7.35466207846213e-07	6.64539805656993e-08	1.05647383191839e-07	0	1.26016885681517e-07	0	0	0	0	0	2.38210890055325e-07	0	0	5.87076571015952e-08	0	0	0	0	0	0	0	0	3.58672540451113e-07
ASAL_015	1.92694193267803e-07	0	7.09493536364531e-08	5.29589714273367e-07	0	0	1.18642217718327e-06	1.38411814983051e-07	3.12869383335081e-06	0	0	0	7.69247019834447e-07	0	2.02738952768619e-06	9.87562962229609e-08	0	0	0	0	0	0	0	0	1.84620675635329e-06	0	7.60001297708285e-06	0	1.1150920270039e-07	0	9.17872803116608e-07	4.43218311331707e-07	0	0	0	0	0	0	0	1.91576020722943e-07	0	0	0	4.99252820102207e-07	0	0	0	0	1.35125336468858e-06
ASAL_016	0	0	2.00588760453866e-07	7.57664934885527e-07	0	0	1.32073131217635e-06	0	2.67584469340749e-06	0	0	0	1.37542542066568e-06	0	1.93321369831575e-06	2.45036846293575e-07	0	0	0	0	0	0	0	0	3.03406870542573e-06	0	2.17191318913401e-06	3.31044023043273e-07	2.87573006768293e-07	0	4.50494401311116e-07	4.89476744927684e-07	0	0	0	0	6.99233098967278e-08	0	0	3.35485287601259e-07	0	0	0	1.79881935048435e-07	0	0	0	0	2.30450883075943e-06
ASAL_017	0	0	0	1.51835384292517e-06	0	0	1.29821166962861e-07	2.49514286840329e-07	3.07359514322512e-06	0	0	0	4.03821431602979e-07	0	6.79929792197088e-07	0	0	0	9.75677637959322e-08	0	0	0	0	0	1.81700704552749e-06	0	3.22704928597485e-06	8.38384830591409e-08	0	0	1.2498333277e-07	4.59208340202041e-07	0	0	0	0	0	0	0	2.87912368412701e-07	0	0	0	0	0	0	0	0	7.58620842930383e-07
ASAL_018	2.35912150239999e-07	0	1.53783548292421e-07	1.34181523104703e-06	0	0	1.3885477383274e-06	1.52502010383018e-07	3.27410454559725e-06	0	0	0	6.78550211048541e-07	0	1.48382328504237e-06	1.23891927087726e-07	0	0	0	0	0	0	0	0	1.54111944154416e-06	0	8.23935218027896e-06	0	2.11479993334331e-07	0	9.82690259116705e-07	6.34077138928045e-07	0	0	0	0	0	0	0	2.52932106401122e-07	0	0	0	3.32344942844329e-07	0	0	0	0	7.40159445764209e-07
ASAL_019	0	0	3.87362301607964e-07	1.4155490320943e-06	0	0	1.55274207670759e-06	0	2.18608640872213e-06	0	0	0	1.41117913687646e-06	0	1.28178474837767e-06	1.99828048932935e-07	0	0	0	0	0	0	0	0	3.48398699601299e-06	0	2.66695404256984e-06	1.73979538149862e-07	2.34697075175431e-07	0	6.23992429931353e-07	4.98394469339211e-07	0	0	0	0	3.65112881141733e-08	0	0	3.841424566274e-07	0	0	0	1.75253729256073e-07	0	0	0	0	2.18521661529148e-06
ASAL_020	0	0	0	2.18798403043482e-06	0	0	4.62758342531861e-07	2.33383520297448e-07	3.65763662787508e-06	0	0	0	3.37297572117149e-07	0	2.90673366013193e-07	0	0	0	1.57286688282567e-07	0	0	0	0	0	1.53486795734424e-06	0	2.1401662639541e-06	6.25660533849265e-08	0	0	1.02713932938523e-07	4.94846300035034e-07	0	0	0	0	0	0	0	3.42594557193836e-07	0	0	0	6.2371496362802e-08	0	0	0	0	7.66635043891223e-07
[truncated: 114 more columns]

## Sheet: TableS5_msp_species
sampleID	msp_0005	msp_0026	msp_0030	msp_0069	msp_0108	msp_0146c	msp_0148c	msp_0166	msp_0197	msp_0206	msp_0212	msp_0228	msp_0241	msp_0295	msp_0313	msp_0380	msp_0403	msp_0408	msp_0409	msp_0437c	msp_0446c	msp_0469c	msp_0482	msp_0486	msp_0497	msp_0570	msp_0573	msp_0574c	msp_0603c	msp_0610	msp_0616	msp_0627	msp_0677c	msp_0691	msp_0712	msp_0715c	msp_0742	msp_0833	msp_0844c	msp_0853c	msp_0854	msp_0864	msp_0881	msp_0884	msp_0916	msp_0925	msp_0935	msp_0974c	msp_1006
ASAL_001	0	0	0	0	0	0	5.66751056790229e-06	0	0	0	2.24611630224904e-07	0	0	0	2.45184047203734e-06	3.06204693642669e-06	0	0	0	1.03780343708135e-07	7.85281638461667e-07	0	0	0	0	0	0	0	0	1.49342335338478e-07	5.34299291047716e-08	0	4.56503114230537e-08	0	0	0	4.23509182306878e-06	0	1.50075998831816e-06	0	0	1.01244469525644e-06	1.49057665679791e-05	3.85961460718765e-05	0	0	0	2.77459009379388e-07	0
ASAL_002	0	0	0	0	0	1.32678439504878e-07	2.05047527647241e-06	0	0	0	0	0	0	0	5.00873911020475e-07	4.42649909969099e-07	0	0	0	1.75275828558976e-07	1.18061307725721e-06	0	0	0	0	0	0	0	0	0	0	0	0	0	0	1.55827292373798e-07	2.04055158522495e-06	0	3.11035118946504e-06	4.9457200574251e-07	0	0	1.19221407379465e-05	6.96003512489524e-06	0	0	0	6.39522039980008e-07	0
ASAL_004	0	0	0	0	0	3.92451904499491e-07	3.65567184134989e-07	0	0	0	6.26381724093106e-08	0	0	0	4.72343071036109e-07	2.08296671895476e-06	0	0	0	1.71917427903976e-07	2.22203120890975e-07	0	0	0	0	0	0	0	0	1.15611206018188e-07	6.10450439254609e-08	0	0	0	0	5.55602475759741e-07	5.20142441393419e-07	0	6.89619367758612e-07	2.62743140490828e-07	0	1.79699130971947e-06	1.0159021293293e-05	1.58129126269157e-06	0	0	0	7.14199859815201e-07	0
ASAL_011	0	0	0	0	0	1.18017718160453e-06	4.67212984152951e-06	1.40030864129069e-07	0	0	5.87076571015952e-08	0	0	0	1.77328195250874e-07	1.70488017220249e-06	0	0	0	2.19438669821883e-07	1.26905377331787e-06	0	0	0	0	0	0	0	0	1.60744303737083e-07	0	0	0	0	0	0	5.28412129425004e-07	0	1.46281171752782e-06	0	0	4.5198707407578e-06	1.43631608851051e-05	1.68300866865685e-06	0	0	0	1.67237053480591e-07	0
ASAL_015	0	0	0	0	0	0	9.25057469152374e-07	0	0	0	1.91576020722943e-07	0	0	0	3.39337934306686e-07	1.11132552040244e-06	0	0	0	1.94150120533075e-07	2.97056902023326e-07	0	0	0	0	0	0	0	0	2.10073286149106e-07	0	0	0	0	0	1.59042004571123e-07	7.43079279993699e-07	0	3.80039689953009e-07	1.30767527584619e-07	0	1.17253265461287e-06	9.86078203417825e-06	1.56219476616824e-06	0	0	0	3.62627116142658e-06	0
ASAL_016	0	0	0	0	0	7.07757289791711e-07	2.06943572028667e-06	0	0	0	3.35485287601259e-07	0	0	0	1.10070087046151e-06	7.78405664958957e-07	0	0	0	4.46744527659384e-07	2.3756851158223e-06	0	0	0	0	0	0	0	6.81053258961854e-08	4.19222116858566e-07	3.59108558695854e-08	0	0	0	0	0	8.55440248349763e-07	0	2.09767722173386e-06	0	0	3.79141951352789e-06	8.47238518220238e-06	4.21670454543283e-06	0	0	0	4.83560314835032e-07	0
ASAL_017	0	0	0	0	0	2.18675411929141e-07	1.18358115634022e-06	0	0	0	2.87912368412701e-07	0	0	0	4.40145081615925e-07	1.93948265092546e-07	0	0	0	7.32081458602675e-08	1.19656957792685e-06	0	0	0	0	0	0	0	0	3.2129887217344e-07	0	0	4.62712481281707e-08	0	0	0	9.11174901831363e-07	0	7.45921405528555e-07	0	0	1.4472651741519e-06	2.73991486276569e-06	2.62223935302099e-06	0	0	0	2.72121411921188e-06	0
ASAL_003	0	0	0	0	0	1.52752256623906e-07	1.60165356189708e-06	5.64119678073838e-08	0	0	2.05962066695467e-06	0	0	0	6.60708476407245e-06	5.52503882868737e-07	0	0	0	1.88437851946472e-07	4.33289232225223e-07	0	0	0	0	0	0	0	0	5.79255849076859e-07	0	0	0	0	0	0	1.73226734560369e-06	0	6.83378039246366e-07	5.26862536328949e-07	0	7.49206708061253e-07	1.10543755270763e-05	9.00868408910457e-06	0	0	0	1.82019456421944e-06	0
ASAL_006	0	0	0	0	0	3.90514845472775e-07	4.99301008384049e-07	0	0	0	8.40703434519717e-08	0	0	0	5.51090900536599e-07	6.9409912323153e-07	0	0	0	8.52140344312064e-08	1.05538407057334e-06	0	0	0	0	0	0	0	0	1.27796759905289e-07	4.437819469088e-08	0	0	0	0	2.91516353304717e-07	3.59355299250052e-07	0	7.02441783808352e-07	1.34978210646696e-07	0	9.84142116831506e-07	1.13379667056135e-05	0	0	0	0	1.67122792701589e-06	0
ASAL_009	0	0	0	0	0	1.05570058599394e-06	7.04909399437434e-07	0	0	0	6.12908283637113e-07	0	0	0	2.25485497253597e-07	3.98803915105841e-06	0	0	0	2.70357785982614e-07	5.6700127776819e-07	0	0	0	0	0	0	0	0	2.70861047148623e-07	7.42683029962708e-08	0	0	0	0	0	2.59467135474874e-06	0	5.71194821372327e-07	3.16492925606805e-07	0	4.52323605737889e-06	1.35216610180266e-05	4.60938456207649e-06	0	0	0	6.42089010442683e-07	3.28796531742345e-07
ASAL_010	0	0	0	0	0	2.60773823333464e-07	5.42048873179758e-07	0	0	0	0	0	0	0	5.80505701203571e-07	3.42994639492037e-06	0	0	0	3.68946473452536e-07	2.54822149006281e-06	0	0	0	0	0	0	0	1.55159241963453e-07	0	0	0	0	0	0	0	5.62307931333914e-07	0	8.21824226012984e-07	0	0	8.47714437635998e-07	1.55198686350843e-05	3.60702137991597e-07	0	0	0	5.01082125794846e-06	0
ASAL_018	0	0	0	0	0	9.36394182486103e-08	9.10711377903728e-07	0	0	0	2.52932106401122e-07	0	0	0	3.11120668063219e-07	1.7916169122113e-06	0	0	0	3.33602086431046e-07	1.79946961181803e-07	0	0	0	0	0	0	0	0	3.37785145345211e-07	3.3997732756276e-08	0	0	0	0	1.37865228207876e-07	9.51055062964258e-07	0	2.87136938588527e-07	0	0	9.36719038320753e-07	1.01864020565112e-05	1.2184160020313e-06	0	0	0	6.74737374195473e-06	0
ASAL_019	0	0	0	0	0	1.25975966906129e-06	1.9153504045745e-06	0	0	0	3.841424566274e-07	0	0	0	1.24611012430317e-06	4.80180299435434e-06	0	0	0	6.11824752278887e-07	2.69288396511273e-06	0	0	0	0	0	0	0	7.07212884326994e-08	2.57840977832835e-07	8.60358712146208e-08	0	0	0	0	1.11863378292862e-07	1.26195081084106e-06	0	2.3547364471533e-06	1.18313023814763e-07	0	3.3862710599468e-06	7.90262402289734e-06	4.12318272083833e-06	0	0	0	1.29075812183503e-06	0
ASAL_020	0	0	0	0	0	3.55620681123109e-07	8.18585350319211e-07	0	0	0	3.42594557193836e-07	0	0	0	2.86576875992584e-07	6.0674596355653e-07	0	0	0	1.37278679096023e-07	6.44722044503943e-07	0	0	0	0	0	0	0	0	4.54428251826221e-07	0	0	3.69458133102426e-08	0	0	2.39696685172672e-07	1.24075995249496e-06	0	8.39205025241898e-07	0	0	1.89109200378904e-06	1.89280348581083e-06	2.17430100513192e-06	0	0	0	4.05347430968054e-06	0
[truncated: 804 more columns]
